# Supplementary material for: Where differences resemble: sequence-feature analysis in curated databases of intrinsically disordered proteins
Source: Oxford University Press journal article supplement (doi:10.1093/database/bay127), 2018-01-01
Supplement: bay127_supp.pdf [file bay127_supp.pdf]

# Where differences resemble: Sequence-feature analysis in curated databases of intrinsically disordered proteins

Marco Necci<sup>1,2,3</sup>, Damiano Piovesan<sup>1</sup>, Silvio C.E. Tosatto<sup>1,4,\*</sup>

<sup>1</sup> Dept. of Biomedical Sciences, University of Padua, Padua, Italy

<sup>2</sup> Dept. of Agricultural Sciences, University of Udine, via Palladio 8, 33100, Udine, Italy

<sup>3</sup> Fondazione Edmund Mach, Via E. Mach 1, 38010, S. Michele all'Adige, Italy

<sup>4</sup> CNR Institute of Neuroscience, Padua, Italy

\* To whom correspondence should be addressed at:

via U. Bassi 58/b, 35131 Padova, Italy

Email: silvio.tosatto@unipd.it; phone: +39 049 827 6269; fax: +39 049 827 6269

## Supplementary Material

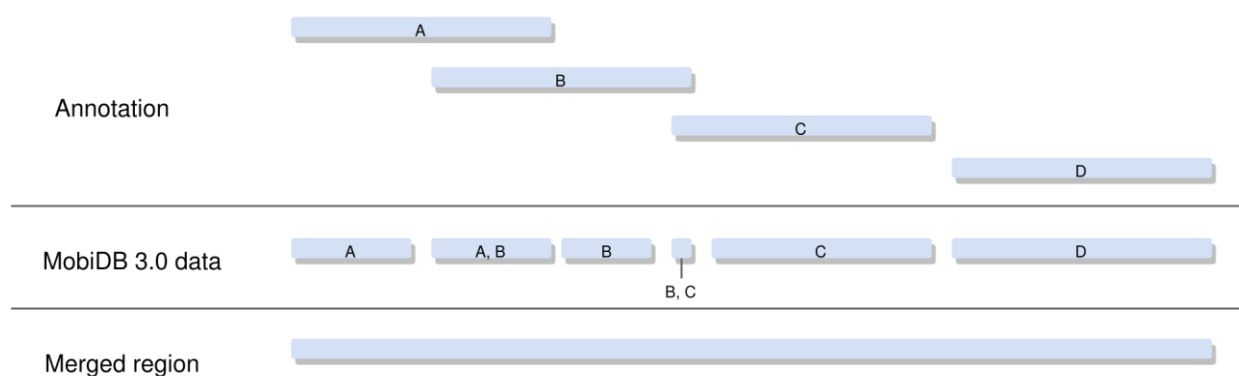

**Figure S1 – Merge strategy for overlapping annotation regions.** Overlapping annotations in the origin datasets are converted to a series of adjacent annotations in MobiDB 3.0. In this analysis, adjacent annotations are considered as a single annotation.

|             |       |         |       |       |       |       |             |            |
|-------------|-------|---------|-------|-------|-------|-------|-------------|------------|
| DIBS        | 12770 | 2852    | 2249  | 428   | 3405  | 413   | 98          | 3325       |
| DisProt     | 2852  | 81659   | 884   | 2998  | 8907  | 1235  | 276         | 64507      |
| ELM         | 2249  | 884     | 19325 | 195   | 1074  | 124   | 36          | 14763      |
| FuzDB       | 428   | 2998    | 195   | 8803  | 742   | 72    | 178         | 4190       |
| IDEAL       | 3405  | 8907    | 1074  | 742   | 47315 | 932   | 165         | 32090      |
| MFIB        | 413   | 1235    | 124   | 72    | 932   | 22487 | 0           | 19711      |
| UniProt-Dis | 98    | 276     | 36    | 178   | 165   | 0     | 38224       | 37471      |
|             | DIBS  | DisProt | ELM   | FuzDB | IDEAL | MFIB  | UniProt-Dis | Unique res |

**Figure S2 – Number of overlapping residues.** Each cell represents the ID regions overlap between a database pair. Unique residues are those annotated uniquely by a single database. The count is by row, e.g. DIBS annotates 3,325 residues.

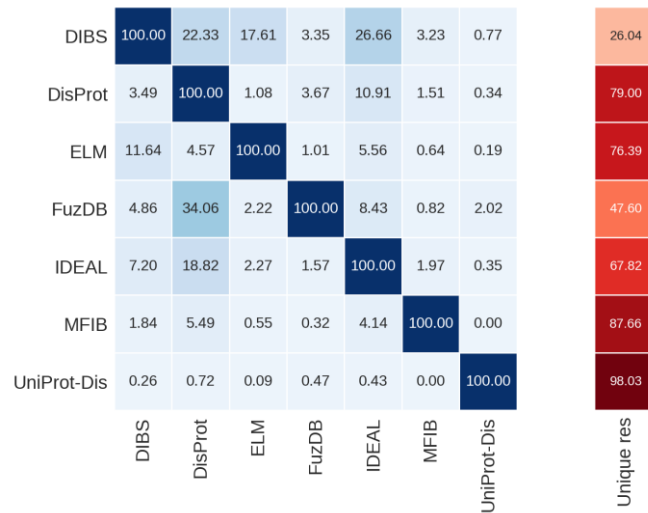

**Figure S3 – Fraction of overlapping residues.** As in Figure S2 but numbers represent percentages calculated over the database size, e.g. DIBS uniquely annotates 26.04% of its ID residues.

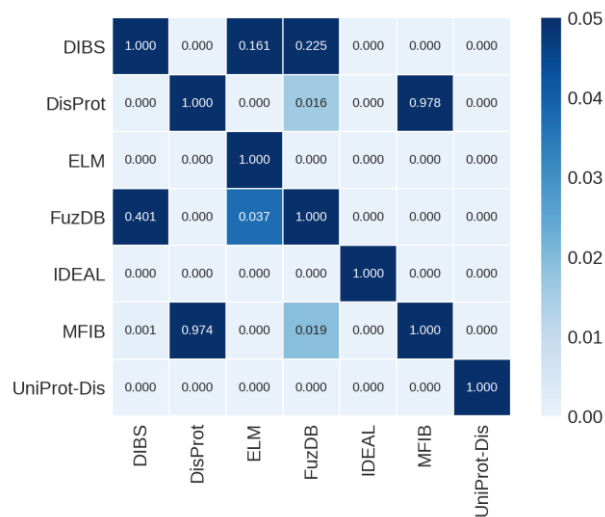

**Figure S4 – Taxonomic diversity significance.** Significance is calculated with the Chi-square test and represent diversity of the taxonomic distribution, P-value < 0.05 represents significantly different distributions. The Chi-square is directional, but the test is consistent in both directions.

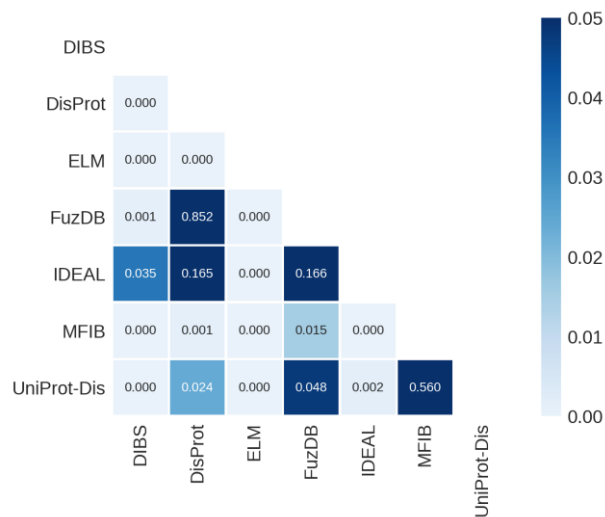

**Figure S5 – Heat map of statistical significance of differences in region lengths.** The P-value represents the statistical significance of the difference between database length distribution and it is calculate with a T-test.

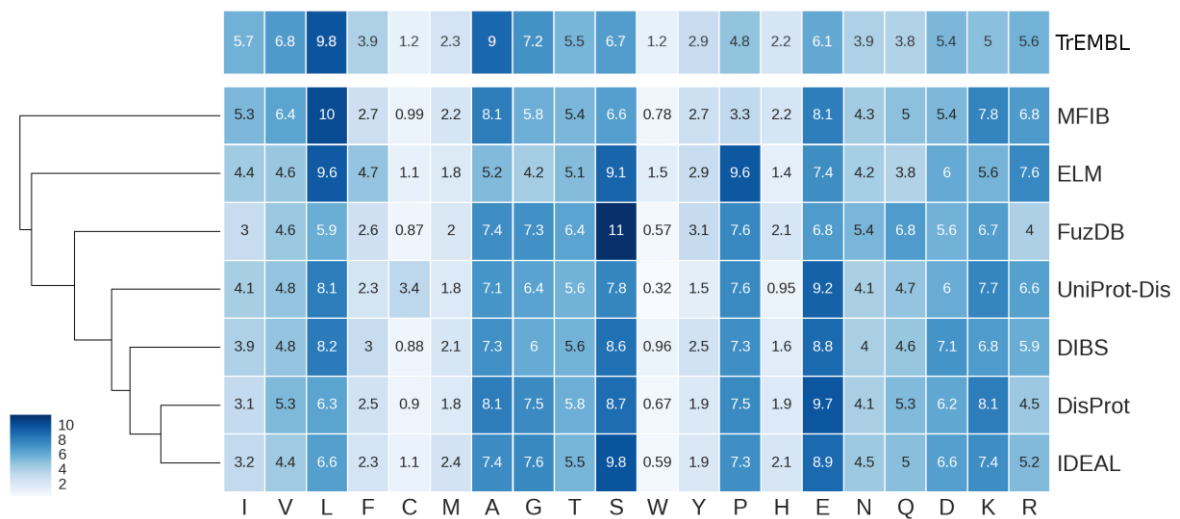

**Figure S6 – Hierarchically clustered heat map of amino acid absolute frequencies.** Clustering is based on Euclidean distance between frequency vectors. Each value represent amino acid frequencies of each database.

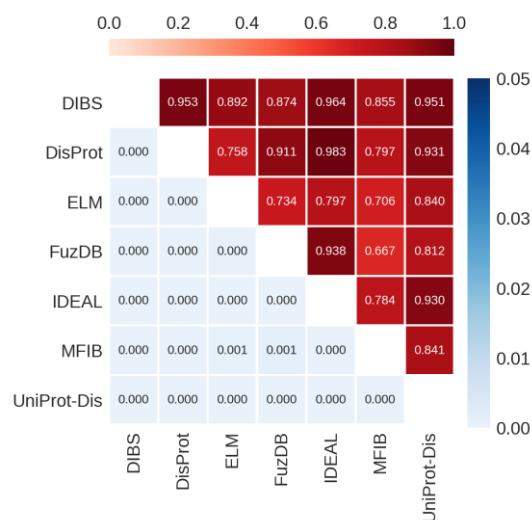

**Figure S7 – Correlation matrix of absolute amino acid frequencies.** Correlation coefficients (in red) and correlation p-values (in blue) of absolute amino acid.

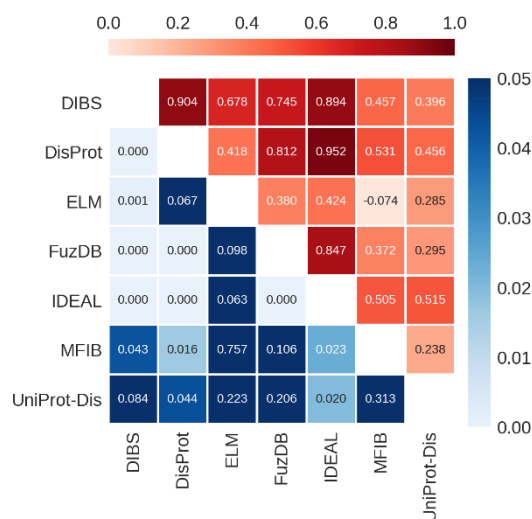

**Figure S8 – Correlation matrix of fold increase amino acid frequencies.** Correlation coefficients (in red) and correlation p-values (in blue) of fold increase compared to TrEMBL reference frequencies.

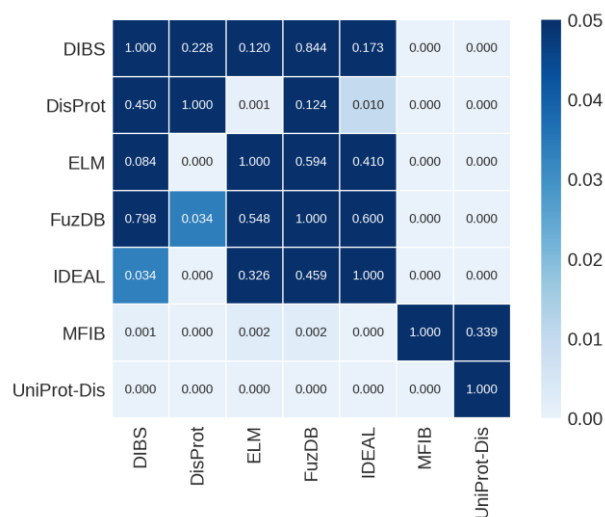

**Figure S9 –Heat map of statistical significance of differences in conformational propensity.** Significance is calculated with the Chi-square test and represent diversity in the distribution of the five different Pappu’s classes. P-value < 0.05 represents significantly different distributions. The Chi-square is directional, but the test is consistent in both directions.

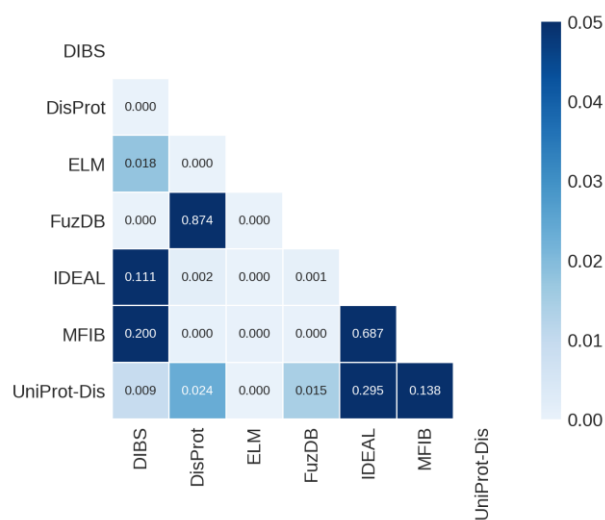

**Figure S10 –Heat map of statistical significance of differences in region low complexity content.** The P-value represents the statistical significance of the difference between region low complexity content distribution and it is calculate with a T-test.
